# Supplementary material for: Tuning Mg(OH)2 Structural, Physical, and Morphological Characteristics for Its Optimal Behavior in a Thermochemical Heat-Storage Application
Source: MDPI journal article supplement (doi:10.3390/ma14051091), 2021-02-26
Supplement: s1 [file s1]

# Tuning $\text{Mg}(\text{OH})_2$ Structural, Physical, and Morphological Characteristics for Its Optimal Behavior in a Thermochemical Heat-Storage Application

Elpida Piperopoulos <sup>1,2,\*</sup>, Marianna Fazio <sup>1</sup>, Emanuela Mastronardo <sup>3</sup>, Maurizio Lanza <sup>4</sup> and Candida Milone <sup>1,2</sup>

<sup>1</sup> Department of Engineering, University of Messina, 98166 Messina, Italy; faziom@unime.it (M.F.); cmilone@unime.it (C.M.)

<sup>2</sup> National Interuniversity Consortium of Materials Science and Technology (INSTM), 50121 Florence, Italy

<sup>3</sup> Institute of Catalysis and Petrochemistry, Spanish National Research Council (CSIC), E-28049 Madrid, Spain; e.mastronardo@csic.es

<sup>4</sup> Institute for Chemical and Physical Processes (IPCF)—CNR, 98158 Messina, Italy; lanza@ipcf.cnr.it

\* Correspondence: epiperopoulos@unime.it

It is shown in Figure S1 the lower mass measured for the same powder volume (0.1 ml) of (a) C-MH sample with respect to (b) CTAB-DP-MH and (c) N-DP-MH samples.

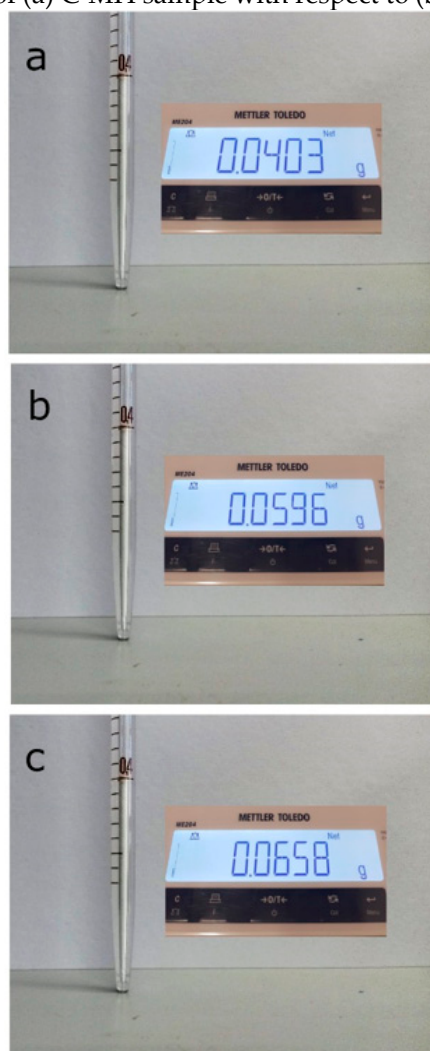

**Figure S1.** Measured mass for 0.1 ml of (a) C-MH, (b) CTAB-DP-MH and (c) N-DP-MH samples.

**Citation:** Piperopoulos, E.; Fazio, M.; Mastronardo, E.; Lanza, M.; Milone, C. Tuning  $\text{Mg}(\text{OH})_2$  Structural, Physical, and Morphological Characteristics for Its Optimal Behavior in a Thermochemical Heat-Storage Application. *Materials* **2021**, *14*, 1091. <https://doi.org/10.3390/ma14051091>

Academic Editor: Simona Bennici

Received: 21 January 2021

Accepted: 23 February 2021

Published: 26 February 2021

**Publisher's Note:** MDPI stays neutral with regard to jurisdictional claims in published maps and institutional affiliations.

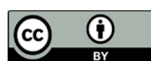

**Copyright:** © 2021 by the authors. Submitted for possible open access publication under the terms and conditions of the Creative Commons Attribution (CC BY) license (<http://creativecommons.org/licenses/by/4.0/>).
